# Supplementary material
Source: PubMed Central journal article supplement (PMC3206313)
Supplement: NIHMS235496-supplement-supp_table_1.pdf [file NIHMS235496-supplement-supp_table_1.pdf]

| chromosome | start    | end      | length(bp) | Sample_Number | Sample_ID |                     | type_of_alteration  | Copy Number                      |                     |                     |                     |                     |                     |                     |                     |                     |               |          |          |
|------------|----------|----------|------------|---------------|-----------|---------------------|---------------------|----------------------------------|---------------------|---------------------|---------------------|---------------------|---------------------|---------------------|---------------------|---------------------|---------------|----------|----------|
| 9          | 32078626 | 32253051 | 17424      | 5             | GSM417221 | BC93.CEL GSM417251  | BC123.CEL GSM417254 | BC126.CEL GSM417363              | BC138.CEL GSM417385 | BC160.CEL           |                     |                     |                     |                     |                     |                     |               |          |          |
| 9          | 32127295 | 32276746 | 14952      | 5             | GSM417193 | BC65.CEL GSM417196  | BC68.CEL GSM417205  | BC77.CEL GSM417206               | BC78.CEL GSM417206  | BC92.CEL GSM417234  | BC106.CEL GSM417243 | BC115.CEL GSM417249 | BC121.CEL GSM417256 | BC128.CEL GSM417366 | BC141.CEL           | Amplification       | 2.697738      |          |          |
| 9          | 32253063 | 32765029 | 511977     | 5             | GSM417221 | BC93.CEL GSM417251  | BC123.CEL GSM417254 | BC126.CEL GSM417363              | BC138.CEL GSM417385 | BC160.CEL           |                     |                     |                     |                     |                     |                     |               |          |          |
| 9          | 32276746 | 32429424 | 152679     | 9             | GSM417196 | BC68.CEL GSM417205  | BC77.CEL GSM417206  | BC78.CEL GSM417206               | BC92.CEL GSM417234  | BC106.CEL GSM417243 | BC115.CEL GSM417249 | BC121.CEL GSM417256 | BC128.CEL GSM417366 | BC141.CEL           |                     | Deletion            | 1.574833      |          |          |
| 9          | 32429424 | 32765029 | 335606     | 9             | GSM417196 | BC68.CEL GSM417205  | BC77.CEL GSM417206  | BC78.CEL GSM417206               | BC92.CEL GSM417234  | BC106.CEL GSM417243 | BC115.CEL GSM417249 | BC121.CEL GSM417256 | BC128.CEL GSM417366 | BC141.CEL           |                     | Deletion            | 1.537774      |          |          |
| 9          | 32765029 | 33202543 | 437515     | 4             | GSM417251 | BC123.CEL GSM417254 | BC126.CEL GSM417363 | BC138.CEL GSM417385              | BC160.CEL           |                     |                     |                     |                     |                     |                     |                     |               |          |          |
| 9          | 32765029 | 33885497 | 120669     | 10            | GSM417196 | BC68.CEL GSM417205  | BC77.CEL GSM417206  | BC78.CEL GSM417206               | BC92.CEL GSM417234  | BC106.CEL GSM417243 | BC115.CEL GSM417249 | BC121.CEL GSM417256 | BC128.CEL GSM417366 | BC141.CEL           |                     | Deletion            | 1.539588      |          |          |
| 9          | 32885497 | 33200588 | 315162     | 11            | GSM417196 | BC68.CEL GSM417205  | BC77.CEL GSM417206  | BC78.CEL GSM417206               | BC92.CEL GSM417234  | BC106.CEL GSM417243 | BC115.CEL GSM417249 | BC121.CEL GSM417256 | BC128.CEL GSM417366 | BC141.CEL GSM417375 | BC150.CEL           |                     | Deletion      | 1.515865 |          |
| 9          | 32900858 | 33200588 | 301686     | 11            | GSM417196 | BC68.CEL GSM417205  | BC77.CEL GSM417206  | BC78.CEL GSM417206               | BC92.CEL GSM417234  | BC106.CEL GSM417243 | BC115.CEL GSM417249 | BC121.CEL GSM417256 | BC128.CEL GSM417366 | BC141.CEL           |                     | Deletion            | 1.539588      |          |          |
| 9          | 33202543 | 33228068 | 25526      | 4             | GSM417251 | BC123.CEL GSM417254 | BC126.CEL GSM417363 | BC138.CEL GSM417385              | BC160.CEL           |                     |                     |                     |                     |                     |                     |                     |               |          |          |
| 9          | 33202543 | 33232916 | 30374      | 11            | GSM417196 | BC68.CEL GSM417205  | BC77.CEL GSM417206  | BC78.CEL GSM417206               | BC92.CEL GSM417234  | BC106.CEL GSM417243 | BC115.CEL GSM417249 | BC121.CEL GSM417256 | BC128.CEL GSM417366 | BC141.CEL GSM417377 | BC152.CEL           |                     | Amplification | 2.947445 |          |
| 9          | 33228068 | 33905339 | 677272     | 4             | GSM417251 | BC123.CEL GSM417254 | BC126.CEL GSM417363 | BC138.CEL GSM417385              | BC160.CEL           |                     |                     |                     |                     |                     |                     |                     |               |          |          |
| 9          | 33232916 | 33303397 | 70482      | 10            | GSM417196 | BC68.CEL GSM417205  | BC77.CEL GSM417206  | BC78.CEL GSM417206               | BC92.CEL GSM417234  | BC106.CEL GSM417243 | BC115.CEL GSM417249 | BC121.CEL GSM417256 | BC128.CEL GSM417366 | BC141.CEL           |                     | Deletion            | 1.539588      |          |          |
| 9          | 33303397 | 33389254 | 85858      | 10            | GSM417196 | BC68.CEL GSM417205  | BC77.CEL GSM417206  | BC78.CEL GSM417206               | BC92.CEL GSM417234  | BC106.CEL GSM417243 | BC115.CEL GSM417249 | BC121.CEL GSM417256 | BC128.CEL GSM417366 | BC141.CEL           |                     | Deletion            | 1.513332      |          |          |
| 9          | 33389254 | 33431670 | 42417      | 11            | GSM417196 | BC68.CEL GSM417205  | BC77.CEL GSM417206  | BC78.CEL GSM417206               | BC92.CEL GSM417234  | BC106.CEL GSM417243 | BC115.CEL GSM417249 | BC121.CEL GSM417256 | BC128.CEL GSM417366 | BC141.CEL GSM417381 | BC156.CEL           |                     | Deletion      | 1.493437 |          |
| 9          | 33431670 | 33466451 | 34782      | 11            | GSM417196 | BC68.CEL GSM417205  | BC77.CEL GSM417206  | BC78.CEL GSM417206               | BC92.CEL GSM417234  | BC106.CEL GSM417243 | BC115.CEL GSM417249 | BC121.CEL GSM417256 | BC128.CEL GSM417366 | BC141.CEL           |                     | Deletion            | 1.51332       |          |          |
| 9          | 33466451 | 33592959 | 126509     | 10            | GSM417196 | BC68.CEL GSM417205  | BC77.CEL GSM417206  | BC78.CEL GSM417206               | BC92.CEL GSM417234  | BC106.CEL GSM417243 | BC115.CEL GSM417249 | BC121.CEL GSM417256 | BC128.CEL GSM417366 | BC141.CEL           |                     | Deletion            | 1.549747      |          |          |
| 9          | 33592959 | 33691266 | 99218      | 11            | GSM417196 | BC68.CEL GSM417205  | BC77.CEL GSM417206  | BC78.CEL GSM417206               | BC92.CEL GSM417234  | BC106.CEL GSM417243 | BC115.CEL GSM417249 | BC121.CEL GSM417256 | BC128.CEL GSM417366 | BC141.CEL GSM417378 | BC153.CEL           |                     | Deletion      | 1.485930 |          |
| 9          | 33691266 | 33795191 | 103626     | 10            | GSM417196 | BC68.CEL GSM417205  | BC77.CEL GSM417206  | BC78.CEL GSM417206               | BC92.CEL GSM417234  | BC106.CEL GSM417243 | BC115.CEL GSM417249 | BC121.CEL GSM417256 | BC128.CEL GSM417366 | BC141.CEL           |                     | Deletion            | 1.549747      |          |          |
| 9          | 33795191 | 33995961 | 199871     | 10            | GSM417196 | BC68.CEL GSM417205  | BC77.CEL GSM417206  | BC78.CEL GSM417206               | BC92.CEL GSM417234  | BC106.CEL GSM417243 | BC115.CEL GSM417249 | BC121.CEL GSM417256 | BC128.CEL GSM417366 | BC141.CEL           |                     | Deletion            | 1.517871      |          |          |
| 9          | 33995961 | 34142613 | 237275     | 10            | GSM417251 | BC123.CEL GSM417254 | BC126.CEL GSM417363 | BC138.CEL GSM417385              | BC160.CEL           |                     |                     |                     |                     |                     |                     |                     |               |          |          |
| 9          | 33995961 | 34084816 | 87956      | 12            | GSM417196 | BC68.CEL GSM417205  | BC77.CEL GSM417206  | BC78.CEL GSM417206               | BC92.CEL GSM417234  | BC106.CEL GSM417243 | BC115.CEL GSM417249 | BC121.CEL GSM417256 | BC128.CEL GSM417366 | BC141.CEL           |                     | Amplification       | 2.896469      |          |          |
| 9          | 34084816 | 34295732 | 210917     | 11            | GSM417196 | BC68.CEL GSM417205  | BC77.CEL GSM417206  | BC78.CEL GSM417206               | BC92.CEL GSM417234  | BC106.CEL GSM417243 | BC115.CEL GSM417249 | BC121.CEL GSM417256 | BC128.CEL GSM417366 | BC141.CEL           |                     | Deletion            | 1.501715      |          |          |
| 9          | 34142613 | 34340254 | 197642     | 4             | GSM417251 | BC123.CEL GSM417254 | BC126.CEL GSM417363 | BC138.CEL GSM417385              | BC160.CEL           |                     |                     |                     |                     |                     |                     |                     |               |          |          |
| 9          | 34295732 | 34399591 | 103860     | 10            | GSM417196 | BC68.CEL GSM417205  | BC77.CEL GSM417206  | BC78.CEL GSM417206               | BC92.CEL GSM417234  | BC106.CEL GSM417243 | BC115.CEL GSM417249 | BC121.CEL GSM417256 | BC128.CEL GSM417366 | BC141.CEL           |                     | Deletion            | 1.517871      |          |          |
| 9          | 34340254 | 34924481 | 584238     | 3             | GSM417251 | BC123.CEL GSM417254 | BC126.CEL GSM417363 | BC138.CEL GSM417385              | BC160.CEL           |                     |                     |                     |                     |                     |                     |                     |               |          |          |
| 9          | 34399591 | 34990034 | 590444     | 10            | GSM417196 | BC68.CEL GSM417205  | BC77.CEL GSM417206  | BC78.CEL GSM417206               | BC92.CEL GSM417234  | BC106.CEL GSM417243 | BC115.CEL GSM417249 | BC121.CEL GSM417256 | BC128.CEL GSM417366 | BC141.CEL           |                     | Deletion            | 1.541888      |          |          |
| 9          | 34924481 | 34990034 | 65554      | 4             | GSM417203 | BC75.CEL GSM417205  | BC123.CEL GSM417254 | BC126.CEL GSM417363              | BC160.CEL           |                     |                     |                     |                     |                     |                     |                     |               |          |          |
| 9          | 34990034 | 35174234 | 184201     | 3             | GSM417251 | BC123.CEL GSM417254 | BC126.CEL GSM417363 | BC138.CEL GSM417385              | BC160.CEL           |                     |                     |                     |                     |                     |                     |                     |               |          |          |
| 9          | 34990034 | 36060199 | 1070166    | 11            | GSM417196 | BC68.CEL GSM417205  | BC77.CEL GSM417206  | BC78.CEL GSM417206               | BC92.CEL GSM417234  | BC106.CEL GSM417243 | BC115.CEL GSM417249 | BC121.CEL GSM417256 | BC128.CEL GSM417366 | BC141.CEL           |                     | Amplification       | 2.582387      |          |          |
| 9          | 35174234 | 35885245 | 711012     | 2             | GSM417251 | BC123.CEL GSM417385 | BC160.CEL           |                                  |                     |                     |                     |                     |                     |                     |                     |                     |               |          |          |
| 9          | 35885245 | 35925900 | 67346      | 3             | GSM417204 | BC76.CEL GSM417204  | BC123.CEL GSM417385 | BC160.CEL                        |                     |                     |                     |                     |                     |                     |                     |                     |               |          |          |
| 9          | 35925900 | 36109866 | 152727     | 2             | GSM417251 | BC123.CEL GSM417385 | BC160.CEL           |                                  |                     |                     |                     |                     |                     |                     |                     |                     |               |          |          |
| 9          | 36060199 | 36078512 | 18314      | 12            | GSM417196 | BC68.CEL GSM417203  | BC75.CEL GSM417205  | BC77.CEL GSM417206               | BC78.CEL GSM417206  | BC92.CEL GSM417221  | BC93.CEL GSM417234  | BC106.CEL GSM417243 | BC115.CEL GSM417249 | BC121.CEL GSM417256 | BC128.CEL GSM417366 | BC141.CEL GSM417377 | BC152.CEL     | Deletion | 1.540713 |
| 9          | 36078512 | 36123410 | 44899      | 12            | GSM417196 | BC68.CEL GSM417203  | BC75.CEL GSM417205  | BC77.CEL GSM417206               | BC78.CEL GSM417206  | BC92.CEL GSM417221  | BC93.CEL GSM417234  | BC106.CEL GSM417243 | BC115.CEL GSM417249 | BC121.CEL GSM417256 | BC128.CEL GSM417366 | BC141.CEL GSM417377 | BC152.CEL     | Deletion | 1.522727 |
| 9          | 36109866 | 36127416 | 17551      | 3             | GSM417251 | BC123.CEL GSM417385 | BC160.CEL           | NA10831_Op1_011206_VHV_B06_1.CEL |                     |                     |                     |                     |                     |                     |                     |                     | Amplification | 2.708793 |          |
| 10         | 88124601 | 88180506 | 55906      | 10            | GSM417185 | BC57.CEL GSM417199  | BC71.CEL GSM417203  | BC75.CEL GSM417204               | BC76.CEL GSM417206  | BC78.CEL GSM417206  | BC78.CEL GSM417206  | BC93.CEL GSM417221  | BC93.CEL GSM417247  | BC119.CEL GSM417252 | BC124.CEL GSM417359 | BC134.CEL GSM417378 | BC153.CEL     | Deletion | 1.531132 |
| 10         | 88180506 | 88181213 | 2708       | 10            | GSM417185 | BC57.CEL GSM417199  | BC71.CEL GSM417203  | BC75.CEL GSM417204               | BC76.CEL GSM417206  | BC78.CEL GSM417206  | BC78.CEL GSM417206  | BC93.CEL GSM417221  | BC93.CEL GSM417247  | BC119.CEL GSM417252 | BC124.CEL GSM417359 | BC134.CEL GSM417378 | BC153.CEL     | Deletion | 1.483194 |
| 10         | 88183213 | 88921150 | 718947     | 11            | GSM417185 | BC57.CEL GSM417199  | BC71.CEL GSM417203  | BC75.CEL GSM417204               | BC76.CEL GSM417206  | BC78.CEL GSM417206  | BC78.CEL GSM417206  | BC93.CEL GSM417221  | BC93.CEL GSM417247  | BC119.CEL GSM417252 | BC124.CEL GSM417359 | BC134.CEL GSM417378 | BC153.CEL     | Deletion | 1.490272 |
| 10         | 88921150 | 88946942 | 44784      | 10            | GSM417185 | BC57.CEL GSM417199  | BC71.CEL GSM417203  | BC75.CEL GSM417204               | BC76.CEL GSM417206  | BC78.CEL GSM417206  | BC78.CEL GSM417206  | BC93.CEL GSM417221  | BC93.CEL GSM417247  | BC119.CEL GSM417252 | BC124.CEL GSM417359 | BC134.CEL GSM417378 | BC153.CEL     | Deletion | 1.476881 |
| 10         | 88946942 | 89123572 | 176631     | 10            | GSM417185 | BC57.CEL GSM417199  | BC71.CEL GSM417203  | BC75.CEL GSM417204               | BC76.CEL GSM417206  | BC78.CEL GSM417206  | BC78.CEL GSM417206  | BC93.CEL GSM417221  | BC93.CEL GSM417247  | BC119.CEL GSM417252 | BC124.CEL GSM417359 | BC134.CEL GSM417378 | BC153.CEL     | Deletion | 1.508145 |
| 10         | 89123572 | 89175140 | 51569      | 10            | GSM417185 | BC57.CEL GSM417199  | BC71.CEL GSM417203  | BC75.CEL GSM417204               | BC76.CEL GSM417206  | BC78.CEL GSM417206  | BC78.CEL GSM417206  | BC93.CEL GSM417221  | BC93.CEL GSM417247  | BC119.CEL GSM417252 | BC124.CEL GSM417359 | BC134.CEL GSM417378 | BC153.CEL     | Deletion | 1.467246 |
| 10         | 89175140 | 89259656 | 84517      | 10            | GSM417185 | BC57.CEL GSM417199  | BC71.CEL GSM417203  | BC75.CEL GSM417204               | BC76.CEL GSM417206  | BC78.CEL GSM417206  | BC78.CEL GSM417206  | BC93.CEL GSM417221  | BC93.CEL GSM417247  | BC119.CEL GSM417252 | BC124.CEL GSM417359 | BC134.CEL GSM417378 | BC153.CEL     | Deletion | 1.511312 |
| 10         | 89259656 | 89267197 | 7542       | 10            | GSM417185 | BC57.CEL GSM417199  | BC71.CEL GSM417203  | BC75.CEL GSM417204               | BC76.CEL GSM417206  | BC78.CEL GSM417206  | BC78.CEL GSM417206  | BC93.CEL GSM417221  | BC93.CEL GSM417247  | BC119.CEL GSM417252 | BC124.CEL GSM417359 | BC134.CEL GSM417378 | BC153.CEL     | Deletion | 1.471973 |
| 10         | 89267197 | 89309487 | 42291      | 11            | GSM417185 | BC57.CEL GSM417199  | BC71.CEL GSM417203  | BC75.CEL GSM417204               | BC76.CEL GSM417206  | BC78.CEL GSM417206  | BC78.CEL GSM417206  | BC93.CEL GSM417221  | BC93.CEL GSM417247  | BC119.CEL GSM417252 | BC124.CEL GSM417359 | BC134.CEL GSM417378 | BC153.CEL     | Deletion | 1.427325 |
| 10         | 89309487 | 89490931 | 189545     | 11            | GSM417185 | BC57.CEL GSM417199  | BC71.CEL GSM417203  | BC75.CEL GSM417204               | BC76.CEL GSM417206  | BC78.CEL GSM417206  | BC78.CEL GSM417206  | BC93.CEL GSM417221  | BC93.CEL GSM417247  | BC119.CEL GSM417252 | BC124.CEL GSM417359 | BC134.CEL GSM417378 | BC153.CEL     | Deletion | 1.472769 |
| 10         | 89490931 | 89642275 | 153744     | 11            | GSM417185 | BC57.CEL GSM417199  | BC71.CEL GSM417203  | BC75.CEL GSM417204               | BC76.CEL GSM417206  | BC78.CEL GSM417206  | BC78.CEL GSM417206  | BC93.CEL GSM417221  | BC93.CEL GSM417247  | BC119.CEL GSM417252 | BC124.CEL GSM417359 | BC134.CEL GSM417378 | BC153.CEL     | Deletion | 1.407621 |
| 10         | 89642275 | 89663466 | 21891      | 11            | GSM417185 | BC57.CEL GSM417199  | BC71.CEL GSM417203  | BC75.CEL GSM417204               | BC76.CEL GSM417206  | BC78.CEL GSM417206  | BC78.CEL GSM417206  | BC93.CEL GSM417221  | BC93.CEL GSM417247  | BC119.CEL GSM417252 | BC124.CEL GSM417359 | BC134.CEL GSM417378 | BC153.CEL     | Deletion | 1.342654 |
| 10         | 89663466 | 89680996 | 16630      | 11            | GSM417185 | BC57.CEL GSM417199  | BC                  |                                  |                     |                     |                     |                     |                     |                     |                     |                     |               |          |          |
