# Supplementary material
Source: PubMed Central journal article supplement (PMC3206313)
Supplement: NIHMS235496-supplement-supp_table_2.pdf [file NIHMS235496-supplement-supp_table_2.pdf]

**Table 2. Pseudogenes aberrantly expressed in human cancer and validated miRNAs binding to their cognate wt genes.**

| Pseudogene                         | Role in human cancer                                                                                                                    | wt gene                                                                                                                                                                                                   | Validated miRNA families                                                                                               | Conservation of the binding site between wt and pseudo                            |
|------------------------------------|-----------------------------------------------------------------------------------------------------------------------------------------|-----------------------------------------------------------------------------------------------------------------------------------------------------------------------------------------------------------|------------------------------------------------------------------------------------------------------------------------|-----------------------------------------------------------------------------------|
| <i>PTENP1</i>                      | see text                                                                                                                                | <i>PTEN</i> :<br>see text                                                                                                                                                                                 | <i>miR-17</i><br><i>miR-19</i><br><i>miR-21</i><br><i>miR-26</i><br><i>miR-214</i><br><i>miR-216</i><br><i>miR-217</i> | yes<br>yes<br>yes<br>yes<br>yes<br>no<br>no                                       |
| $\psi$ <i>CX43</i>                 | specifically expressed in breast cell lines (not in normal mammary epithelium) <sup>1</sup>                                             | <i>CONNEXIN 43 (CX43)</i> : one of the monomers that compose gap junctions. CX43 expression is aberrantly lost in cancer.                                                                                 | <i>miR-1</i> <sup>2</sup>                                                                                              | yes                                                                               |
| <i>NA88-A</i>                      | specifically expressed in melanoma cell lines (not in normal melanocytes) <sup>3</sup>                                                  | <i>HPX42B</i>                                                                                                                                                                                             | -                                                                                                                      |                                                                                   |
| <i>OCT4-pg1</i><br><i>OCT4-pg5</i> | specifically expressed in cancer cell lines and tissues (not in normal tissues) <sup>4</sup>                                            | <i>OCT4</i> : transcription factor expressed in embryonic stem cells where it plays a critical role in maintaining the pluripotent and self-renewing state. Oct4 is aberrantly expressed in cancer cells. | <i>miR-145</i> <sup>5</sup><br><br><i>miR-470</i> <sup>6</sup>                                                         | yes<br><br><i>miR-470</i> is mouse-spec                                           |
| <i>NANOGP8</i>                     | specifically expressed in cancer cell lines and tissues (not in normal fibroblasts and fetal liver) <sup>7</sup>                        | <i>NANOG</i> : transcription factor expressed in embryonic stem cells where it plays a critical role in maintaining the pluripotent and self-renewing state. Oct4 is aberrantly expressed in cancer cells | <i>miR-134</i> <sup>8</sup><br><br><i>miR-296</i> <sup>6</sup>                                                         | no*<br><br><i>miR-296</i> binding sites are not conserved between human and mouse |
| $\psi$ <i>BRAF</i>                 | specifically expressed in thyroid tumor samples (especially if they don't carry BRAF mutations), and not in normal thyroid <sup>9</sup> | <i>BRAF</i> : Ser/Thr kinase that serves as downstream effector of RAS in the MAPK signaling cascade. Mutations that render BRAF constitutively active are common in cancer.                              | -                                                                                                                      | -                                                                                 |

The conservation of *miR-17*, *19*, *21*, *26* and *214* binding sites in *PTENP1* has been discussed elsewhere (**Fig. 1**). The asterisk indicates those wt/pseudogene pairs that show an overall low sequence conservation (<60%).

**References 1-9**

- 1 Kandouz, M., Bier, A., Carystinos, G.D., Alaoui-Jamali, M.A., & Batist, G., Connexin43 pseudogene is expressed in tumor cells and inhibits growth. *Oncogene* 23 (27), 4763-4770 (2004).
- 2 Anderson, C., Catoe, H., & Werner, R., MIR-206 regulates connexin43 expression during skeletal muscle development. *Nucleic Acids Res* 34 (20), 5863-5871 (2006).
- 3 Moreau-Aubry, A. *et al.*, A processed pseudogene codes for a new antigen recognized by a CD8(+) T cell clone on melanoma. *J Exp Med* 191 (9), 1617-1624 (2000).
- 4 Suo, G. *et al.*, Oct4 pseudogenes are transcribed in cancers. *Biochem Biophys Res Commun* 337 (4), 1047-1051 (2005).
- 5 Xu, N., Papagiannakopoulos, T., Pan, G., Thomson, J.A., & Kosik, K.S., MicroRNA-145 regulates OCT4, SOX2, and KLF4 and represses pluripotency in human embryonic stem cells. *Cell* 137 (4), 647-658 (2009).
- 6 Tay, Y., Zhang, J., Thomson, A.M., Lim, B., & Rigoutsos, I., MicroRNAs to Nanog, Oct4 and Sox2 coding regions modulate embryonic stem cell differentiation. *Nature* 455 (7216), 1124-1128 (2008).
- 7 Zhang, J. *et al.*, NANOGP8 is a retrogene expressed in cancers. *FEBS J* 273 (8), 1723-1730 (2006).
- 8 Tay, Y.M. *et al.*, MicroRNA-134 modulates the differentiation of mouse embryonic stem cells, where it causes post-transcriptional attenuation of Nanog and LRH1. *Stem Cells* 26 (1), 17-29 (2008).
- 9 Zou, M. *et al.*, Oncogenic activation of MAP kinase by BRAF pseudogene in thyroid tumors. *Neoplasia* 11 (1), 57-65 (2009).
